# Supplementary material
Source: PubMed Central journal article supplement (PMC3001830)
Supplement: Supp_Data.pdf [file Supp_Data.pdf]

SUPPLEMENTAL TABLE S1. TEST (OF PROPORTIONS) FOR ASSOCIATION BETWEEN RESPONSE RATE AND RESPONSE

| <i>Independent variable</i> | <i>Sample population<br/>(n = 446)</i> | <i>Respondents<br/>(n = 105)</i> | <i>Response rate (95%<br/>credible interval)</i> | <i>p-Value</i> |
|-----------------------------|----------------------------------------|----------------------------------|--------------------------------------------------|----------------|
| Inclusion of minors         |                                        |                                  |                                                  |                |
| Yes                         | 99                                     | 29                               | 0.29 (0.21, 0.38)                                | 0.31           |
| No                          | 344                                    | 76                               | 0.22 (0.18, 0.27)                                |                |
| Disease type                |                                        |                                  |                                                  |                |
| Neoplasms                   | 79                                     | 24                               | 0.30 (0.20, 0.40)                                | 0.13           |
| Endocrine                   | 70                                     | 11                               | 0.15 (0.08, 0.24)                                |                |
| Blood                       | 40                                     | 12                               | 0.30 (0.17, 0.44)                                |                |
| Mental                      | 35                                     | 8                                | 0.22 (0.10, 0.36)                                |                |
| Nervous system              | 33                                     | 17                               | 0.52 (0.35, 0.68)                                |                |
| Circulatory                 | 59                                     | 16                               | 0.27 (0.16, 0.38)                                |                |
| Respiratory                 | 27                                     | 7                                | 0.26 (0.11, 0.42)                                |                |
| Musculoskeletal             | 19                                     | 9                                | 0.47 (0.26, 0.68)                                |                |
| Other                       | 84                                     | 15                               | 0.18 (0.10, 0.26)                                |                |
| Degree                      |                                        |                                  |                                                  |                |
| Ph.D.                       | 220                                    | 67                               | 0.30 (0.25, 0.37)                                | 0.03           |
| M.D.                        | 320                                    | 67                               | 0.21 (0.17, 0.25)                                |                |
| M.D./Ph.D.                  | 148                                    | 32                               | 0.22 (0.15, 0.28)                                |                |

*p*-Values are tests of the null hypothesis that the response rate does not vary by responder category.
